# Supplementary material for: Megalin-dependent Yellow endocytosis restricts melanization in theDrosophilacuticle
Source: Oxford University Press journal article supplement (doi:10.1242/dev.056309), 2010-12-07

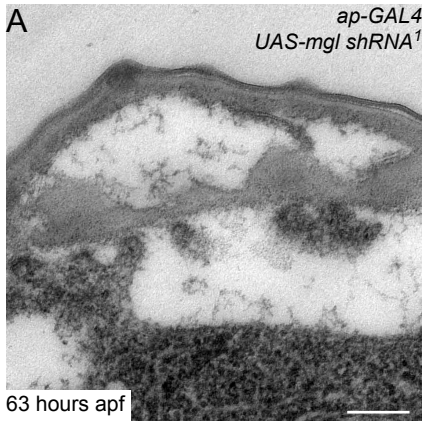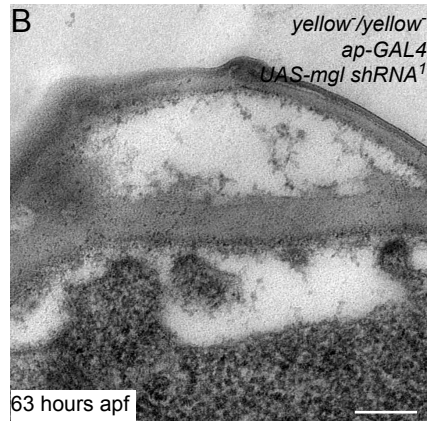

**C** *C765-GAL4* **D**

*C765-Gal4*  
*UAS-mgl shRNA<sup>2</sup>*

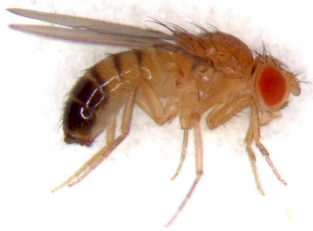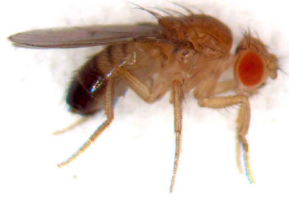

**E** *yellow/yellow*  
*C765-GAL4* **F**

*yellow/yellow*  
*C765-GAL4*  
*UAS-mgl shRNA<sup>2</sup>*

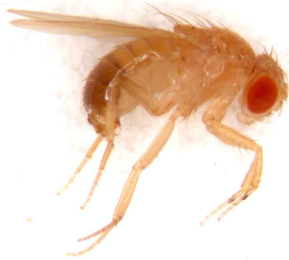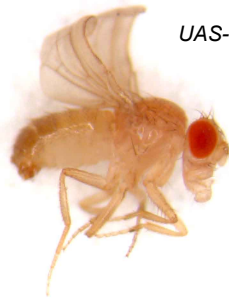

**G** *C765-GAL4*  
*UAS-yellow shRNA* **H**

*C765-GAL4*  
*UAS-yellow shRNA*  
*UAS-mgl shRNA<sup>2</sup>*

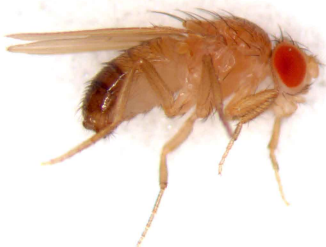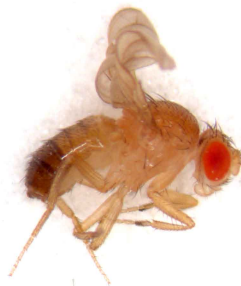

Supplement: dev056309figs4.pdf [file dev056309figs4.pdf]
