# Supplementary material for: Megalin-dependent Yellow endocytosis restricts melanization in theDrosophilacuticle
Source: Oxford University Press journal article supplement (doi:10.1242/dev.056309), 2010-12-07
Supplement: dev056309figs6.pdf [file dev056309figs6.pdf]

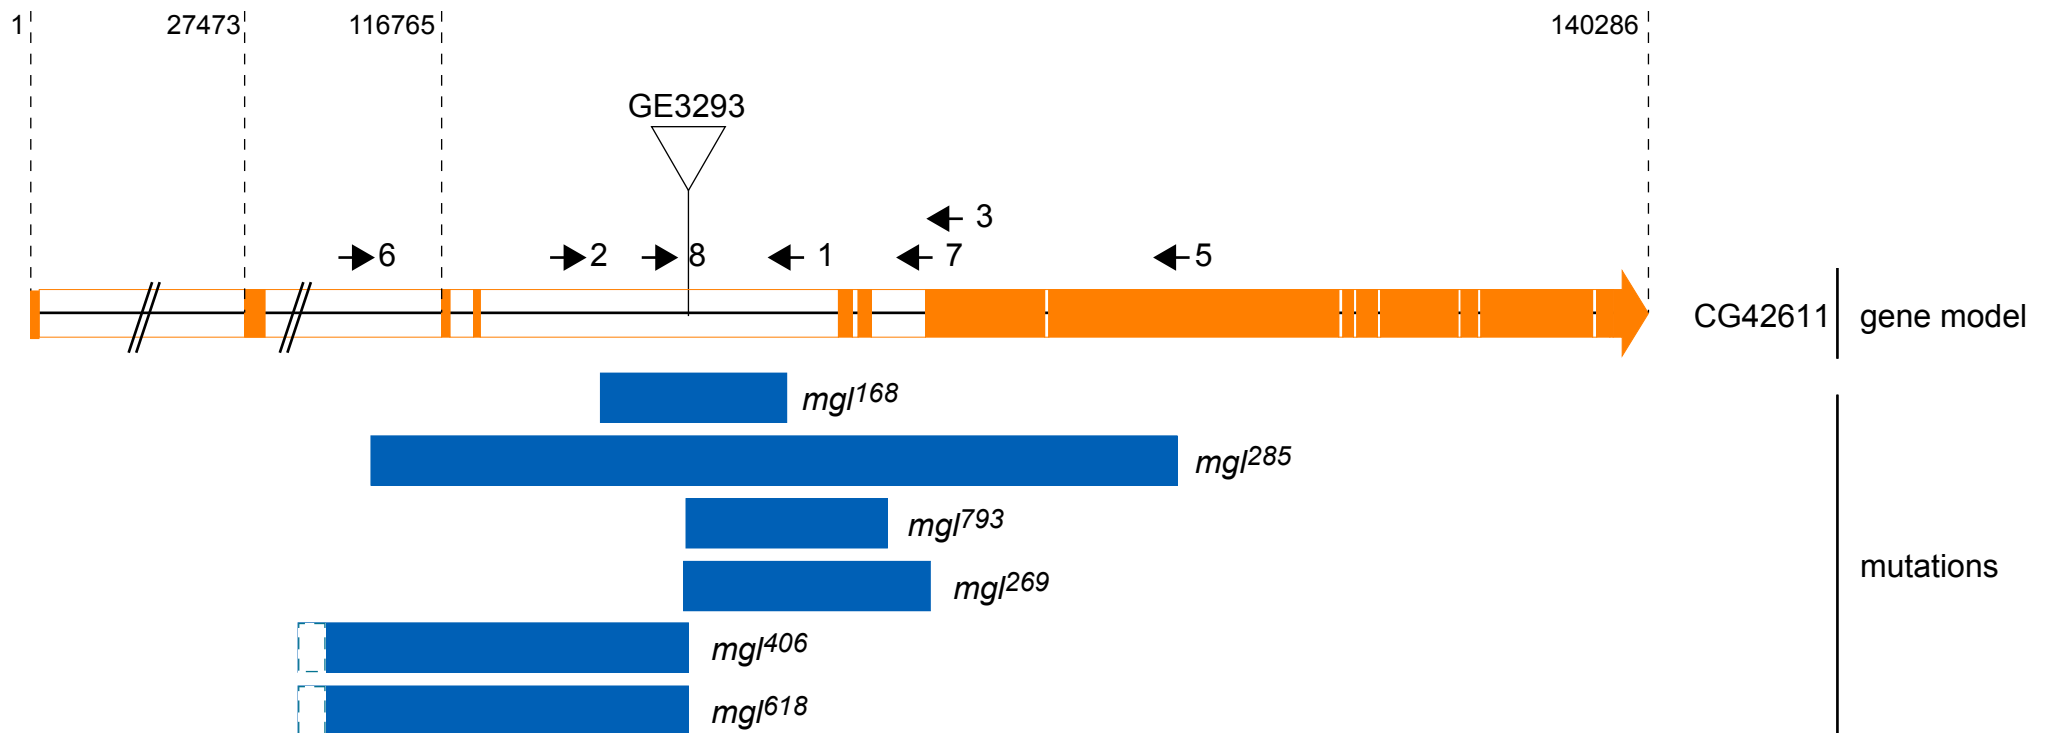

| Allele          | Deleted nucleotides of CG42611 | Viability | Coding sequence | Protein levels* | P-element GE3293   | Clones**   | Yellow uptake*** | PCR to amplify the sequence flanking the deletion**** |          |
|-----------------|--------------------------------|-----------|-----------------|-----------------|--------------------|------------|------------------|-------------------------------------------------------|----------|
|                 |                                |           |                 |                 |                    |            |                  | Primer pair (5'-3')                                   | Amplicon |
| <i>mgl[168]</i> | 119875 – 123577                | lethal    | unaffected      | undetectable    | excised            | not tested | not tested       | 1: CAGTACTTGTA AAAACTGGG<br>2: GCACAATAATTTATCGCGCTTA | 333 bp   |
| <i>mgl[269]</i> | 121585 – 126308                | lethal    | affected        | undetectable    | completely present | yes        | not tested       | 3: TTATCGCCCACCCAGTCGAC<br>4: CGACGGGACCACCTTATG      | 428 bp   |
| <i>mgl[285]</i> | 115520 – 131136                | lethal    | affected        | undetectable    | excised            | yes        | reduced          | 5: CTGGAAGACTACAATGGGAT<br>6: AAAAAGGGGTTCCAAAATGG    | 422 bp   |
| <i>mgl[406]</i> | <39167 - 121585                | lethal    | affected        | undetectable    | partially present  | yes        | reduced          | not applicable                                        |          |
| <i>mgl[608]</i> | <39167 - 121585                | lethal    | affected        | undetectable    | excised            | not tested | not tested       | not applicable                                        |          |
| <i>mgl[793]</i> | 121585 - 125550                | viable    | affected        | normal          | excised            | not tested | not tested       | 7: TGGGTCAGGTAATGCAAATA<br>8: GTTAAGTGTCTCATAAACTG    | 956 bp   |
