# Supplementary figures and images for: Megalin-dependent Yellow endocytosis restricts melanization in theDrosophilacuticle
Source: Oxford University Press journal article supplement (doi:10.1242/dev.056309), 2010-12-07

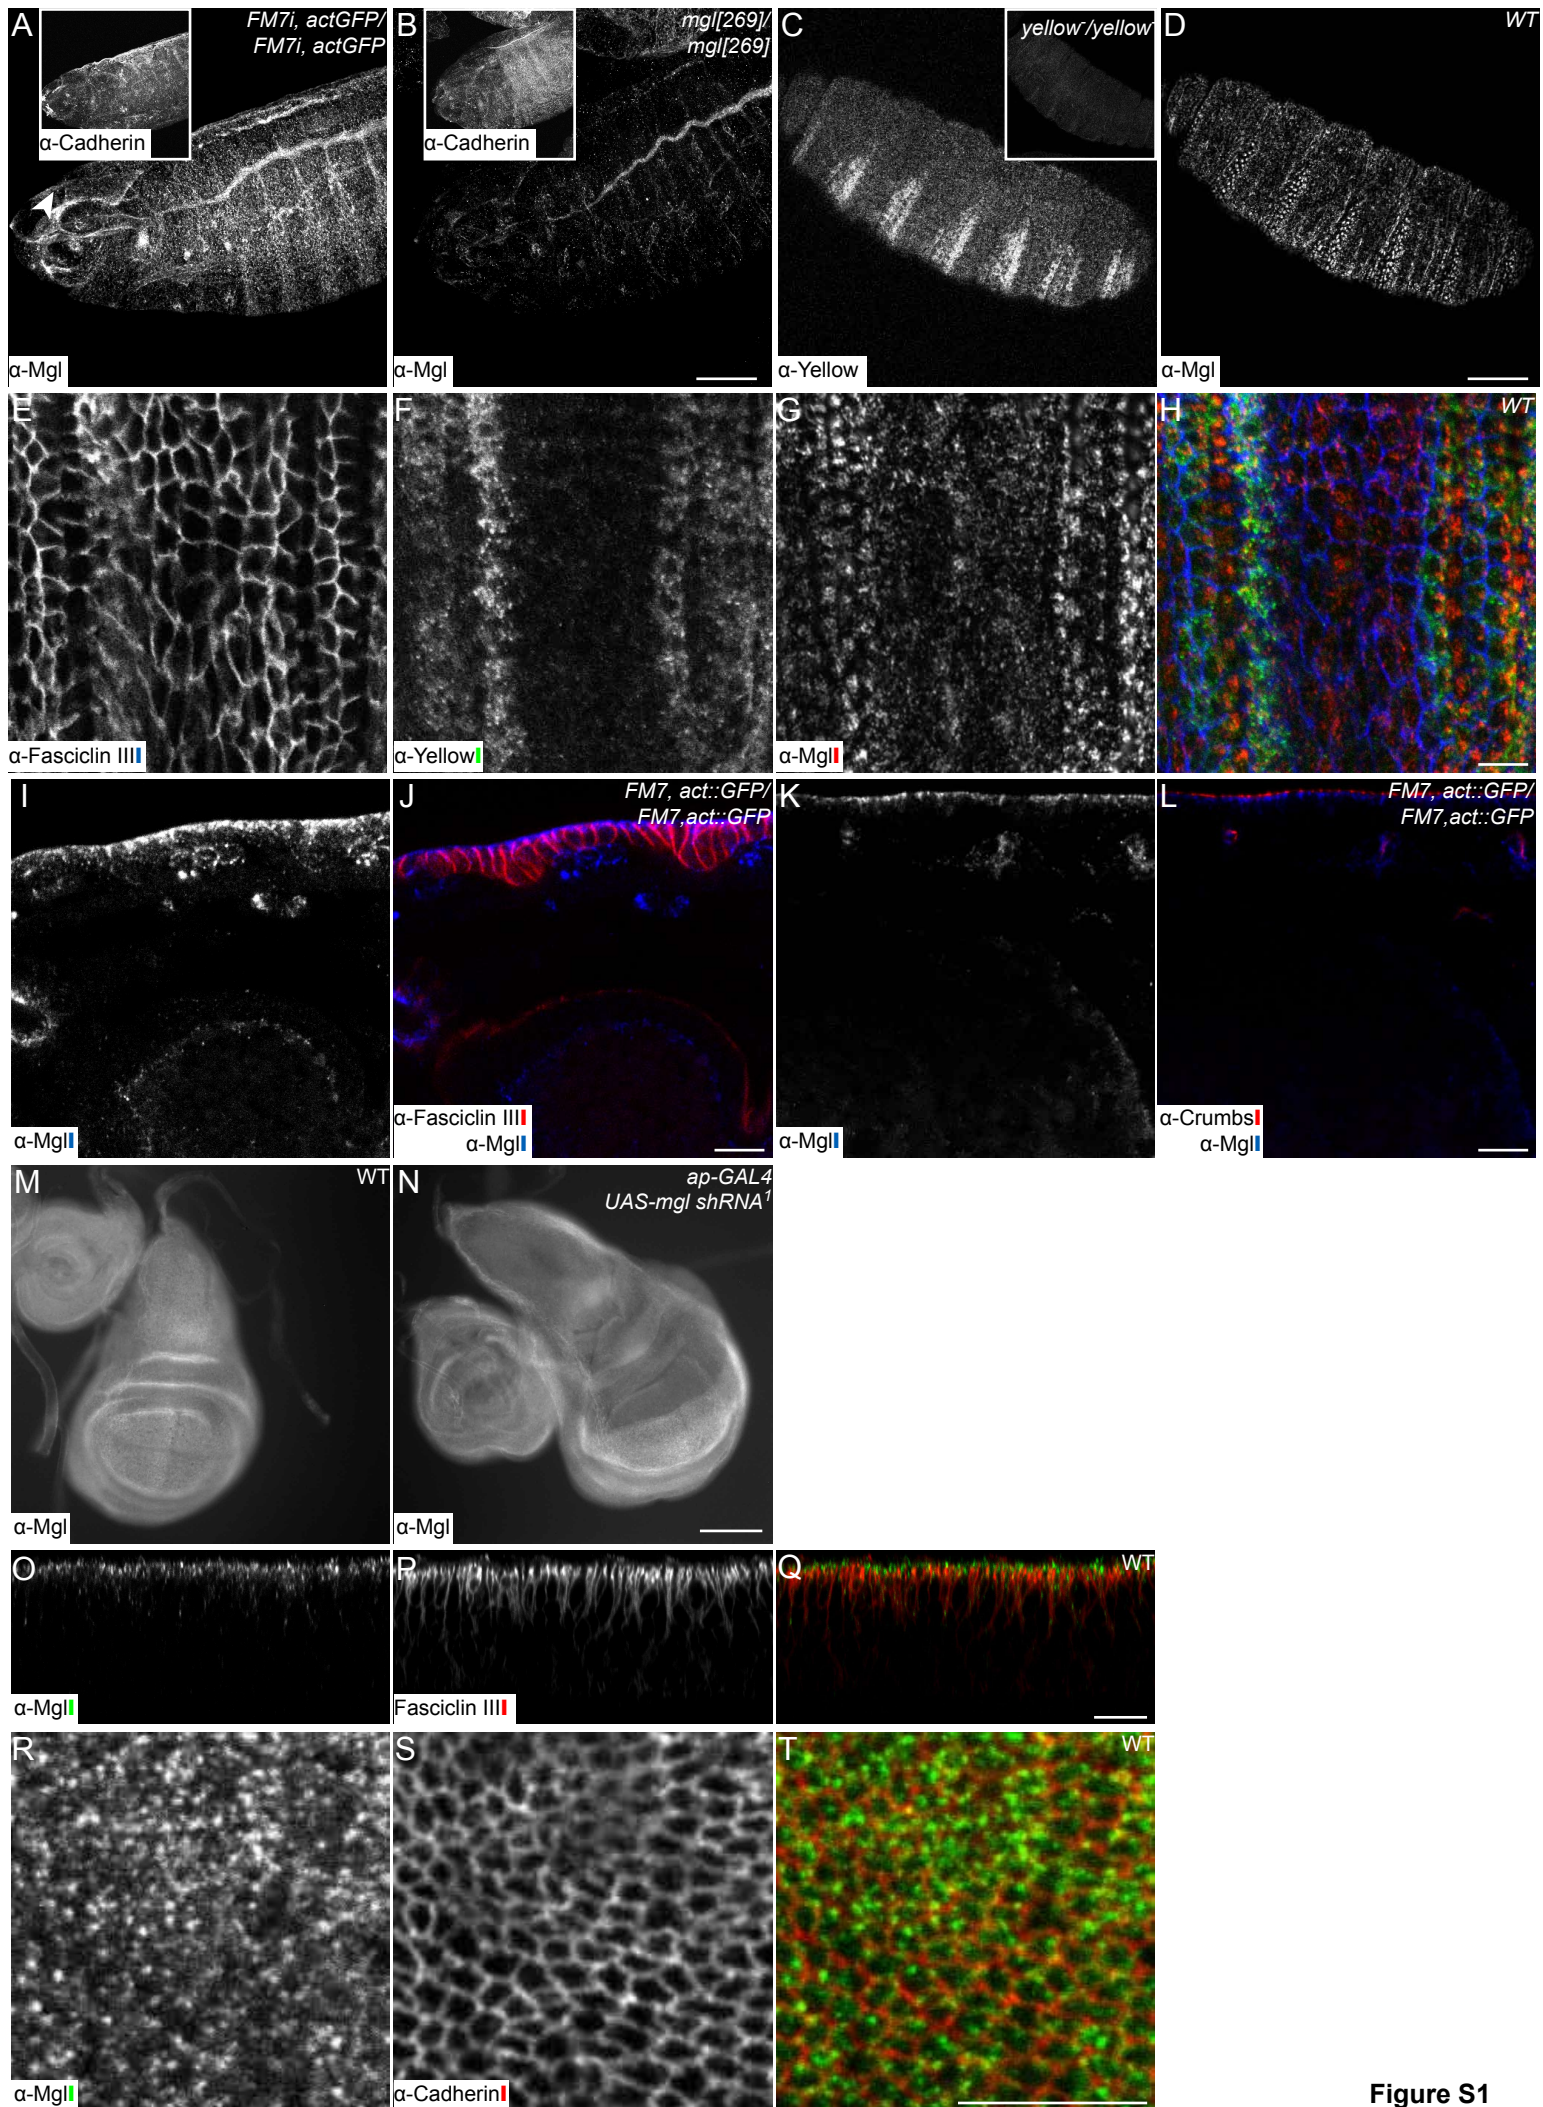

Figure S1

Supplement: dev056309figs1.pdf [file dev056309figs1.pdf]

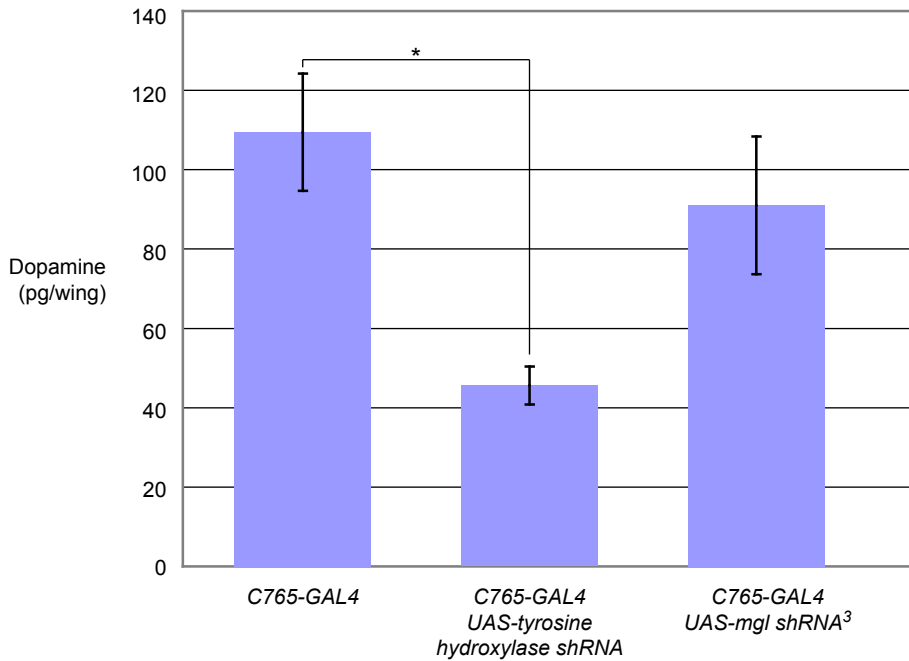

Supplement: dev056309figs2.pdf [file dev056309figs2.pdf]

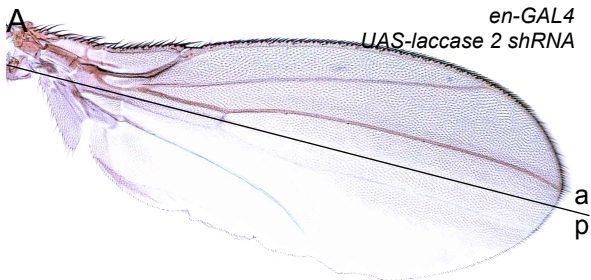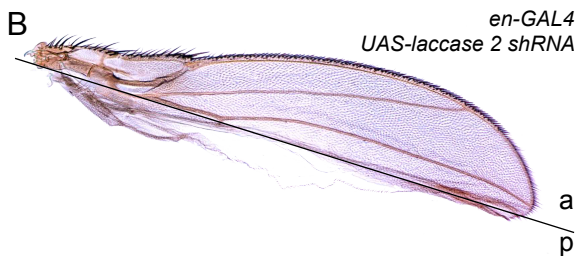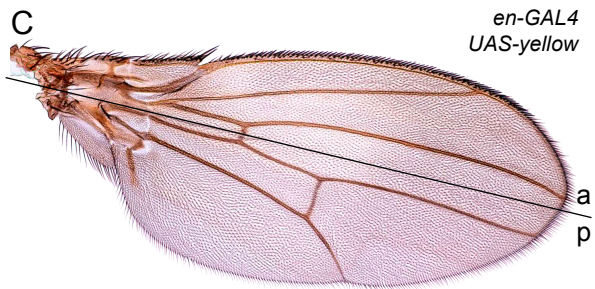

Supplement: dev056309figs3.pdf [file dev056309figs3.pdf]

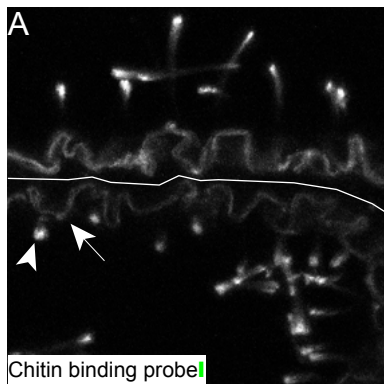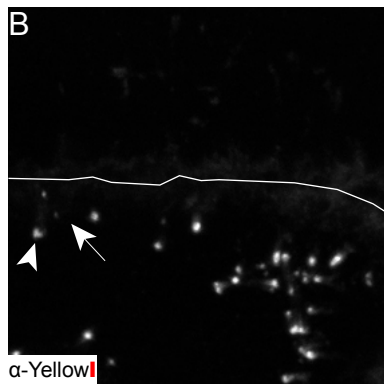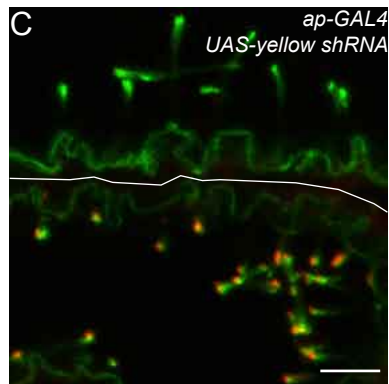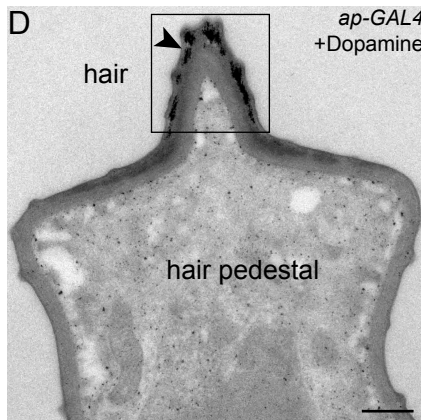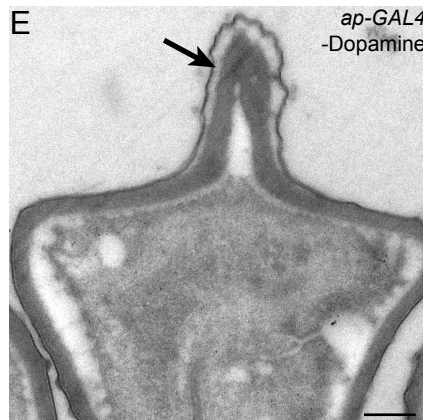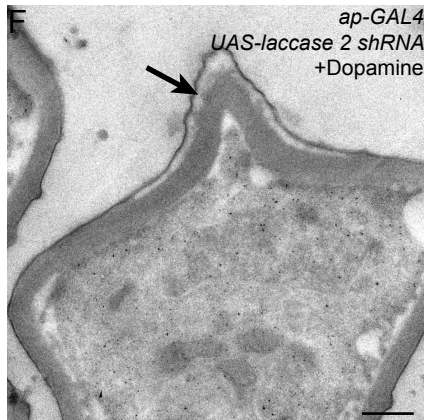

Supplement: dev056309figs5.pdf [file dev056309figs5.pdf]
